# Supplementary material for: Diagnostic Performance of (1→3)-β-D-Glucan Alone and in Combination with Aspergillus PCR and Galactomannan in Serum of Pediatric Patients after Allogeneic Hematopoietic Stem Cell Transplantation
Source: MDPI journal article supplement (doi:10.3390/jof7030238), 2021-03-22
Supplement: s1 [file s1]

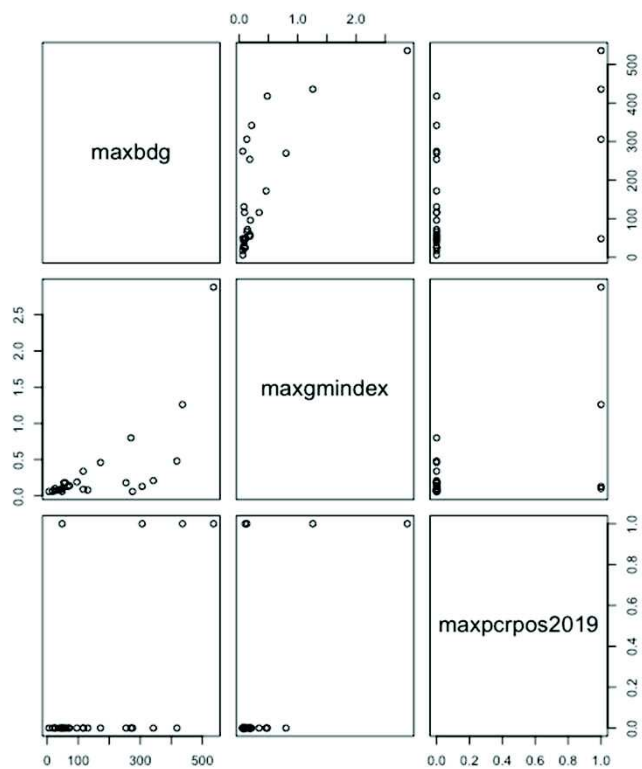

Figure. S1. Matrix of scatterplots indicating the relations between three diagnostic tests.

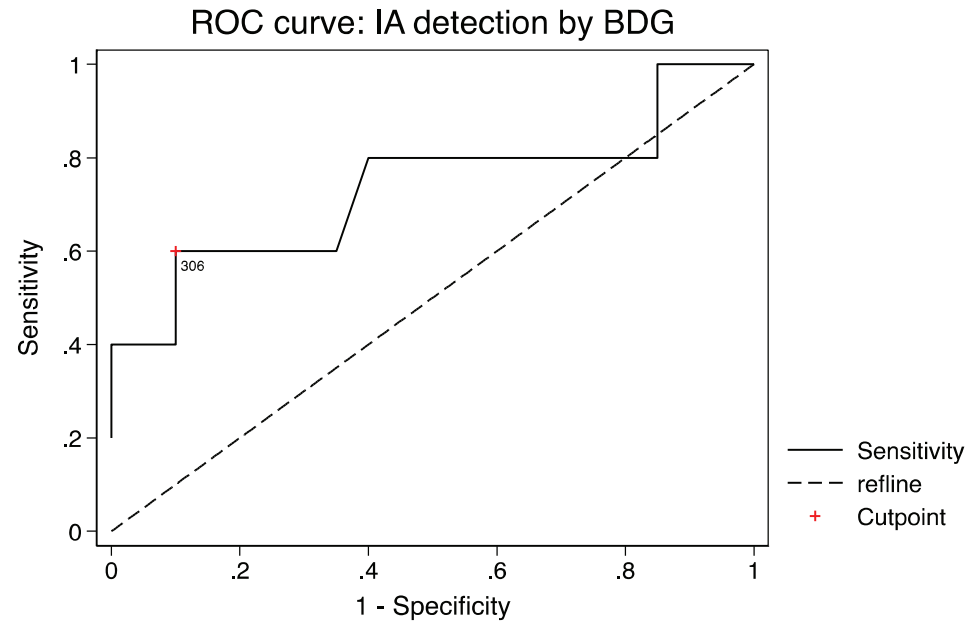

Fig. S2. ROC curve analysis of BDG testing showing the optimal cutoff value of 306 pg/ml including probable IA/possible IFD cases and not classified patients as controls. Sensitivity was 60%, specificity was 90%, and the fraction of the correctly classified patients was 84%. The area under the curve was 0.735 (95% CI: 0.4095, 1).

Table S1. Grouping of patients by maxGM index reporting main summary indexes of maxbdg

| <b>maxGMpos2019 a</b> | <b>patients</b> | <b>mean</b> | <b>sd</b> | <b>median</b> | <b>IQR</b> |
|-----------------------|-----------------|-------------|-----------|---------------|------------|
| 0                     | 23              | 130         | 120       | 72            | 166        |
| 1                     | 2               | 486         | 70.7      | 486           | 50         |

a: Maxgmpos2019 = 0 is low level (normal), maxgm = 1 is high (outside the norm).  
standard deviation (sd), interquartile range (IQR)

Table S2. Grouping of patients by maxPCR2019 index reporting main summary indexes of maxBDG.

| maxPCRpos2019 a | patients | mean | sd  | median | IQR |
|-----------------|----------|------|-----|--------|-----|
| 0               | 21       | 126  | 118 | 72     | 127 |
| 1               | 4        | 332  | 211 | 371    | 220 |

a: Maxpcrpos2019 = 0 is no target detection, maxpcrpos2019 = 1 is the opposite.  
standard deviation (sd), interquartile range (IQR)

Table S3. Grouping of patients by maxPCR2019 index reporting main summary indexes of maxGM.

| <b>maxPCRpos2019 a</b> | <b>patients</b> | <b>mean</b> | <b>sd</b> | <b>median</b> | <b>IQR</b> |
|------------------------|-----------------|-------------|-----------|---------------|------------|
| 0                      | 21              | 0.192       | 0.186     | 0.13          | 0.11       |
| 1                      | 4               | 1.09        | 1.31      | 0.695         | 1.54       |

a: Maxpcrpos2019 = 0 is no target detection, maxpcrpos2019 = 1 is the opposite.  
standard deviation (sd), interquartile range (IQR)
